# Supplementary material
Source: Springer Nature journal article supplement (https://www.springermedizin.de/resource/supplementary/12865_2008_193_MOESM5_ESM.pdf/9428710)

## A Proliferation of OT-I CD8+ T cells

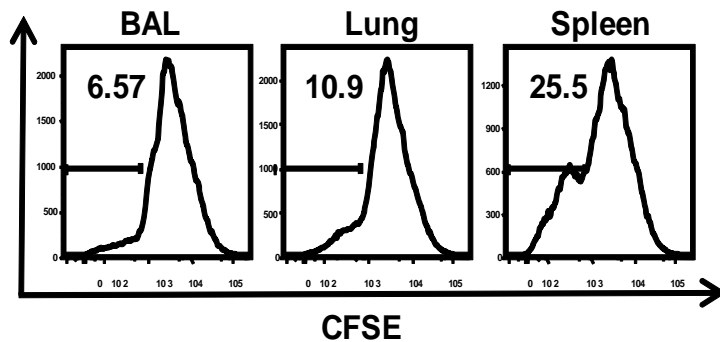

## % proliferation of OT-I CD8+ T cells

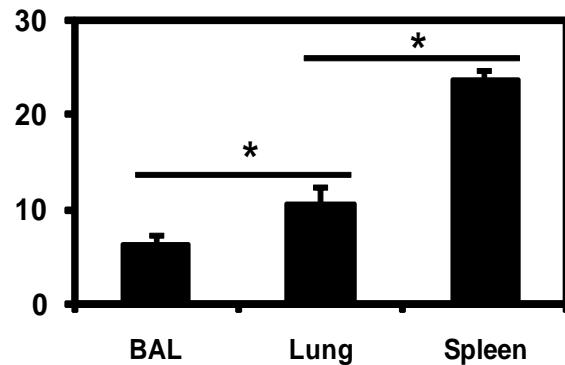

## B Proliferation of OT-II CD4+ T cells

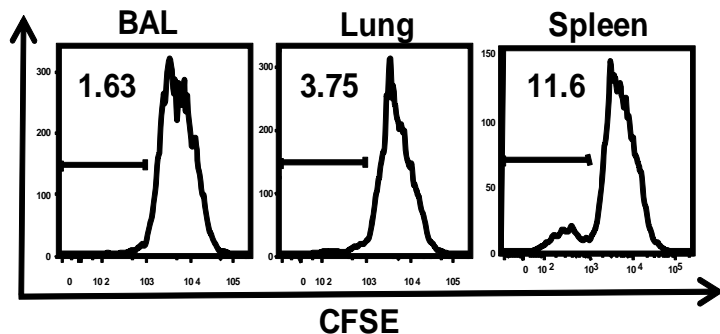

## % proliferation of OT-II CD4+ T cells

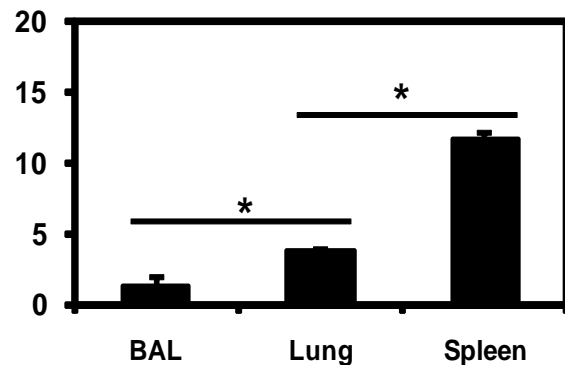

Supplement: MOESM5 [file 9428710]
